# Supplementary material
Source: ML conference proceedings conference paper supplement (https://proceedings.neurips.cc/paper_files/paper/2019/hash/fe5e7cb609bdbe6d62449d61849c38b0-Abstract.html)
Supplement: Supplementary file [file fe5e7cb609bdbe6d62449d61849c38b0-Supplemental.zip]

---

# Supplementary material for Biases for Emergent Communication in Multi-agent Reinforcement Learning

---

Anonymous Author(s)

Affiliation

Address

email

## 1 A Statistical methodology

2 All confidence intervals shown are 95% confidence intervals. For confidence intervals of Bernoulli  
3 variables – the proportion of runs with reward above a certain threshold – we use the Wilson  
4 approximation. For graphs depicting average performance over multiple runs, we first take the mean  
5 reward per run in 100 time windows over training. The interval shown is the 95% confidence interval  
6 for this mean.

## 7 B Environment details

8 To generate a map for the treasure hunt environment, we:

- 9 1. Create a rectangle of grey pixels with height 18 and width 24.
- 10 2. Draw a black tunnel on the second row up, including all but the leftmost and rightmost  
11 pixels.
- 12 3. Draw a black tunnel on the second row down, including all but the leftmost and rightmost  
13 pixels.
- 14 4. Pick 4 starting positions on the top horizontal tunnel for vertical tunnels. These are randomly  
15 selected among sets of positions which are all at least 3 pixels apart (so no tunnel is visible  
16 from another). Draw black tunnels from these positions to 2 pixels above the bottom tunnel.
- 17 5. Place the yellow treasure at the bottom of a random tunnel.
- 18 6. Place one agent uniformly at random in the top tunnel, and one uniformly at random in the  
19 bottom tunnel.

20 The episode length is 500 timesteps. The agents have 5 actions, corresponding to the 4 directions  
21 and a no-op action. They can move in the black tunnels and onto the treasure, but not onto the grey  
22 walls. The agent observation is a  $5 \times 5$  square, centered on the agent. When an agent moves onto the  
23 treasure, both agents receive reward 1, and the treasure respawns at the bottom of a random tunnel.

24 The RGB values of the colors of the pixels in the observations are:

- 25 • Blue self: (0, 0, 255).
- 26 • Red partner agent: (255, 0, 0).
- 27 • Grey walls: (128, 128, 128).
- 28 • Black tunnels: (0, 0, 0).
- 29 • Yellow treasure: (255, 255, 0).

## 30 C Treasure Hunt protocol

31 For the run with median final reward in the final experiments using both positive signalling and  
 32 listening biases, Table 1 shows the frequency with which the treasure was actually located in each  
 33 tunnel, given the symbol sent by the speaker. Table 2 shows the same information, for the best  
 34 performing run.

| Symbol \ Tunnel | 1               | 2               | 3               | 4               |
|-----------------|-----------------|-----------------|-----------------|-----------------|
| 0               | $0.12 \pm 0.01$ | $0.08 \pm 0.01$ | $0.35 \pm 0.03$ | $0.46 \pm 0.03$ |
| 1               | $0.36 \pm 0.02$ | $0.35 \pm 0.02$ | $0.22 \pm 0.01$ | $0.07 \pm 0.01$ |
| 2               | $0.06 \pm 0.01$ | $0.05 \pm 0.00$ | $0.14 \pm 0.01$ | $0.75 \pm 0.02$ |
| 3               | $0.32 \pm 0.01$ | $0.35 \pm 0.02$ | $0.24 \pm 0.01$ | $0.09 \pm 0.01$ |
| 4               | $0.27 \pm 0.01$ | $0.28 \pm 0.02$ | $0.24 \pm 0.01$ | $0.20 \pm 0.01$ |

Table 1: Distribution of treasure location depending on speaker’s message for median run.

| Symbol \ Tunnel | 1               | 2               | 3               | 4               |
|-----------------|-----------------|-----------------|-----------------|-----------------|
| 0               | $0.08 \pm 0.01$ | $0.12 \pm 0.01$ | $0.32 \pm 0.02$ | $0.48 \pm 0.02$ |
| 1               | $0.15 \pm 0.01$ | $0.31 \pm 0.02$ | $0.31 \pm 0.02$ | $0.22 \pm 0.01$ |
| 2               | $0.12 \pm 0.01$ | $0.15 \pm 0.01$ | $0.29 \pm 0.02$ | $0.44 \pm 0.02$ |
| 3               | $0.56 \pm 0.03$ | $0.19 \pm 0.02$ | $0.16 \pm 0.02$ | $0.09 \pm 0.02$ |
| 4               | $0.23 \pm 0.02$ | $0.32 \pm 0.02$ | $0.27 \pm 0.02$ | $0.18 \pm 0.02$ |

Table 2: Distribution of treasure location depending on speaker’s message for best run.

## 35 D Network details and hyperparameters

### 36 D.1 MNIST sums experiments

37 In the MNIST sums environment, the agent architecture used was from an existing MNIST classifier;  
 38 we did not optimize this, as the goal was to investigate the effect of communication biases rather than  
 39 to achieve optimal performance. This architecture is:

- 40 • A convolutional neural network, with 2 layers, which have 32 and 64 channels respectively.  
 41 Both layers have kernel size 5, stride 1, and rectified linear unit (ReLU) activations. We use  
 42 max pooling, with stride and kernel 2.
- 43 • One hidden linear layer with 1024 neurons, with ReLU activations.

44 We used the Adam optimizer [3], with a learning rate of 0.0003 and parameters  $\beta_1 = 0.9$ ,  $\beta_2 = 0.999$ ,  
 45  $\epsilon = 10^{-8}$ .

46 For the listener agent, the message is concatenated to the flattened output of the convolutional net  
 47 before the hidden linear layer.

48 The final hyperparameters used for the 4 settings were:

49 To select the hyperparameters for the no bias setting, we performed a joint sweep over action and  
 50 message entropy bonuses, consider a range of values from 0.0 to 0.3 for each. No values were found  
 51 which improved over the no communication policy; the final values reported here are those which  
 52 worked best in the other settings.

53 In the positive listening setting, we performed sweeps:

- 54 • Over the weight of  $L_{pl}$ , using values in (0.01, 0.03, 0.1, 0.3).
- 55 • Over the entropy costs for messages and actions, using values (0.01, 0.03, 0.1).

| Hyperparameter                                | No bias | Positive speaking | Positive listening | Both  |
|-----------------------------------------------|---------|-------------------|--------------------|-------|
| Batch size                                    | 32      | 32                | 32                 | 32    |
| Action policy entropy bonus                   | 0.03    | 0.03              | 0.03               | 0.03  |
| Message policy entropy bonus                  | 0.03    | 0.0               | 0.03               | 0.0   |
| Target message entropy $\mathcal{H}_{target}$ | N/A     | 1.0               | 0.03               | 1.0   |
| Weight of $L_{pl}$                            | N/A     | N/A               | 0.01               | 0.01  |
| Weight of $L_{ps}$                            | N/A     | 0.1               | N/A                | 0.1   |
| Weight of $L_{ce}$                            | N/A     | N/A               | 0.001              | 0.001 |
| $\lambda$ for $L_{ps}$                        | N/A     | 3.0               | N/A                | 3.0   |

Table 3: Hyperparameters for final MNIST experiments.

- Over the weight of  $L_{ce}$ , using values of (0.0, 0.001, 0.01, 0.1); aside from 0, which unsurprisingly produced worse results, there was no significant difference in the results of these runs.

In the positive speaking setting, we performed sweeps:

- Over the weight of  $L_{ps}$  and  $\lambda$ , using values in (0.01, 0.03, 0.1) for  $L_{ps}$ , and (0.01, 0.03, 0.1) for the product  $\lambda L_{ps}$ .

In the setting with both biases, we ran no additional sweeps, simply combining the hyperparameters from the best runs with positive speaking and positive listening.

For all hyperparameter sweeps, we ran 5 runs, and picked the setting with the highest average final reward. For the final sets of hyperparameters, we then ran 50 runs.

## D.2 Treasure Hunt sums experiments

In our experiments, we use 32 parallel environment copies for the Advantage Actor-Critic algorithm [4] with the V-trace correction [1]. The two agents have the same architecture, which consists of:

- A single convolutional layer, using 6 channels, kernel size of 1 and stride of 1.
- A multi-layer perceptron with 2 hidden layers of size 64.
- An LSTM, with hidden size 128.
- Linear layers mapping to policy logits for the action and message policies, and to the baseline value function.

The message from the other agent is concatenated to the flattened output of the convolutional net before the hidden linear layer.

We used the RMSProp optimizer [2] for gradient descent, with a initial learning rate of 0.001, exponentially annealed by a factor of 0.99 every million steps. The other parameters are  $\eta = 0.99$ , and  $\epsilon = 10^{-6}$ .

The final hyperparameters used for the 5 settings were:

| Hyperparameter                                | No comms | No bias | PS    | PL    | Both  |
|-----------------------------------------------|----------|---------|-------|-------|-------|
| Batch size                                    | 16       | 16      | 16    | 16    | 16    |
| Action policy entropy bonus                   | 0.006    | 0.006   | 0.006 | 0.006 | 0.006 |
| Message policy entropy bonus                  | N/A      | 0.0     | 0.0   | 0.0   | 0.0   |
| Target message entropy $\mathcal{H}_{target}$ | N/A      | N/A     | 0.8   | N/A   | 0.8   |
| Weight of $L_{pl}$                            | N/A      | N/A     | 0.003 | N/A   | 0.003 |
| Weight of $L_{ce}$                            | N/A      | N/A     | N/A   | 0.01  | 0.01  |
| Weight of $L_{ps}$                            | N/A      | N/A     | 0.001 | 0.001 | N/A   |
| $\lambda$ for $L_{ps}$                        | N/A      | N/A     | 3.0   | N/A   | 3.0   |

Table 4: Hyperparameters for final Treasure Hunt experiments.

81 In the no communication setting, we performed sweeps:

- 82 • Over the entropy costs for actions, using values (0.001, 0.003, 0.006, 0.01).
- 83 • Over the sizes of the MLP layers, using values (32, 64, 128).
- 84 • Over the sizes of the LSTM hidden size, using values (64, 128).

85 We then fixed these parameters for the other settings.

86 In the positive listening setting, we performed sweeps:

- 87 • Over the weight of  $L_{pl}$ , using values in (0.001, 0.003, 0.01).
- 88 • Over the weight of  $L_{ce}$ , using values of (0.0, 0.001, 0.01).
- 89 • Over the message policy entropy bonus, using values of (0.0, 0.001, 0.003, 0.006, 0.01).

90 In the positive speaking setting, we performed sweeps:

- 91 • Over the weight of  $L_{ps}$  and  $\lambda$ , using values in (0.001, 0.003, 0.01) for  $L_{ps}$ , and  
92 (0.001, 0.003, 0.01) for the product  $\lambda L_{ps}$ .
- 93 • Over the target entropy  $\mathcal{H}_t$ , using values in (0.4, 0.8, 1.6).

94 In the setting with both biases, we ran no additional sweeps, simply combining the hyperparameters  
95 from the best runs with positive speaking and positive listening.

96 For all hyperparameter sweeps, we ran 5 runs, and picked the setting which exceeded the no-  
97 communication baseline most frequently, terminating runs early if the result was clear. For the final  
98 sets of hyperparameters, we then ran 50 runs.

## 99 References

- 100 [1] L. Espeholt, H. Soyer, R. Munos, K. Simonyan, V. Mnih, T. Ward, Y. Doron, V. Firoiu, T. Harley,  
101 I. Dunning, S. Legg, and K. Kavukcuoglu. IMPALA: Scalable Distributed Deep-RL with  
102 Importance Weighted Actor-Learner Architectures. *ArXiv e-prints*, February 2018.
- 103 [2] G. Hinton, N. Srivastava, , and K. Swersky. Lecture 6a: Overview of mini-batch gradient descent.  
104 *Coursera*, 2012.
- 105 [3] Diederik P Kingma and Jimmy Ba. Adam: A method for stochastic optimization. *arXiv preprint*  
106 *arXiv:1412.6980*, 2014.
- 107 [4] Volodymyr Mnih, Adria Puigdomenech Badia, Mehdi Mirza, Alex Graves, Timothy Lillicrap, Tim  
108 Harley, David Silver, and Koray Kavukcuoglu. Asynchronous methods for deep reinforcement  
109 learning. In *International conference on machine learning*, pages 1928–1937, 2016.
